# Supplementary material
Source: publisher figshare collection journal article supplement (https://tandf.figshare.com/ndownloader/files/36573877)
Supplement: Supplementary file 1 [file 36573877]

**Online supplementary - Search terms from the original and updated search**

**MedLine** (identical for both searches)

(mental illness[Title/Abstract]) OR metal disorder[Title/Abstract]) OR mental disorder[MeSH Terms])

AND

(stereotyping[MeSH Terms]) OR Social Norms[MeSH Terms]) OR Social Stigma[MeSH Terms]) OR Social Discrimination[MeSH Terms]) OR Social Dominance[MeSH Terms]) OR Social Isolation[MeSH Terms]) OR Social Marginalization[MeSH Terms]) OR structural discrimination[Title/Abstract]

**Sociological Abstracts (original search)**

SU= Mental illness OR AB=Mental Disorders

AND

SU=Prejudice OR SU=Discrimination OR SU=Social distance OR SU=Social isolation OR SU=Marginality OR SU=Stigma OR SU=Stereotypes OR SU=Norms OR AB=”Structural discrimination” OR AB=”Social dominance”

SU=thesaurus term

AB=abstract

Sociological Abstracts (updated search)

SU= Mental illness OR AB=Mental Disorders

AND

SU=Prejudice OR SU=Discrimination OR SU=Social distance OR SU=Social isolation OR SU=Marginality OR SU=Stigma OR SU=Stereotypes OR SU=Norms OR AB=”Structural discrimination” OR AB=”Social dominance”

SU=thesaurus term

AB=abstract

**PsychInfo (original search)**

SH=Mental disorders OR AB=Mental illness

AND

SH=prejudice OR SH=Social discrimination OR SH=Dominance OR SH=Marginalization OR SH=Stigma OR SH=Stereotyped attitudes OR SH=Social norms OR TW=”Structural discrimination” OR TW=”Social distance” OR TW=”Social dominance”

SH=thesaurus term

TW= title, abstract, table of contents, and key concepts (NOT thesaurus terms)

PsychInfo (updated search)

DE=mental disorders OR TX=mental illness

AND

DE=prejudice OR DE=social discrimination OR DE=dominance OR DE=marginalization OR DE=Stigma OR DE=stereotyped attitudes OR DE=social norms OR TX=”structural discrimination” OR TX=”social distance” OR TX=”social dominance”

DE=subject term

TX= all text fields

**Index to Legal Periodicals & Books (original search)**

SU=Mental illness OR AB=”Mental disorder”

AND

SU=Discrimination OR SU=Discrimination against the mentally ill OR SU= Discrimination against the mentally ill – Law & legislation OR SU=Discrimination in insurance OR SU=Prejudices OR SU=Stigma OR SU=Stereotypes OR SU=Social norms OR AB=”Social distance” OR AB=”Social isolation” OR AB=”Social marginalization” OR AB=”Structural discrimination”

SU=thesaurus term

AB=abstract

Index to Legal Periodicals & Books (updated search)

SU=Mental illness OR AB=”Mental disorder”

AND

SU=discrimination OR SU=discrimination against the mentally ill OR SU=discrimination in insurance OR SU=Prejudices OR SU= social stigma OR SU=stereotypes OR SU=social norms OR AB=”social distance” OR AB=”social isolation” OR AB=”social marginalization” OR AB=”structural discrimination”

SU=thesaurus term

AB=abstract

**NB.** The search registers had changed slightly between the two searches; hence, the two search strings are not completely identical. In ‘Index to legal periodicals and books’ the thesaurus term ’Stigma’ has been changed to ’Social stigma’, and the term ’Discrimination against the mentally ill – Law & legislation’ has been deleted.
